# Supplementary material
Source: publisher figshare collection journal article supplement (https://sage.figshare.com/ndownloader/files/19037126)

## **Supplemental Materials**

### **Prompt: Message 10**

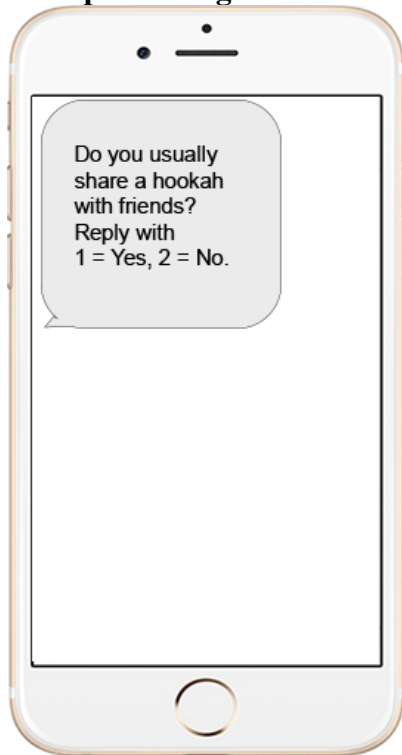

## Responses: Message 10 (Frequent User)

Low perceived risk – no response

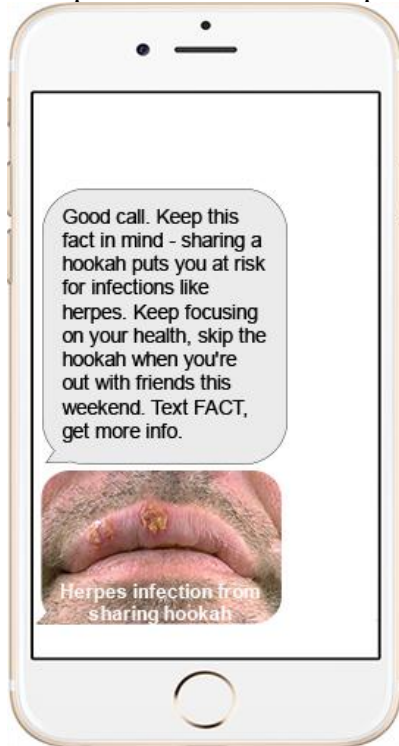

Low perceived risk – yes response

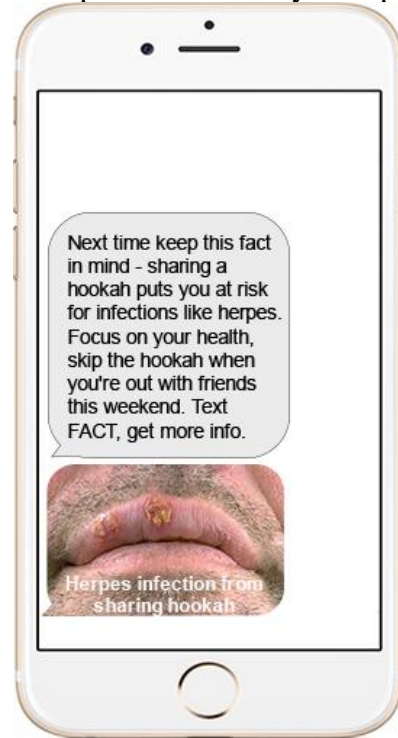

High perceived risk – no response

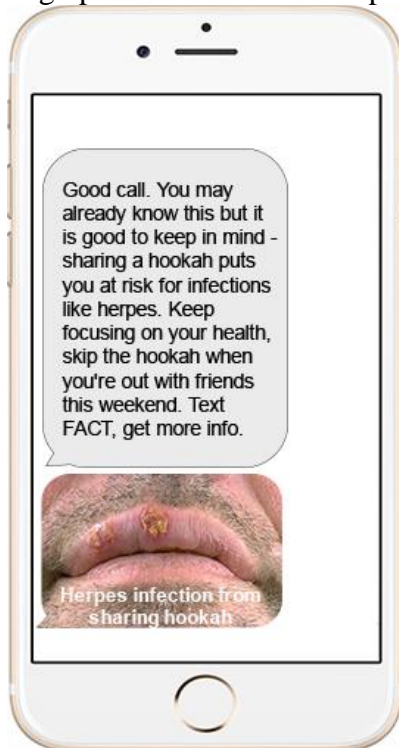

High perceived risk – yes response

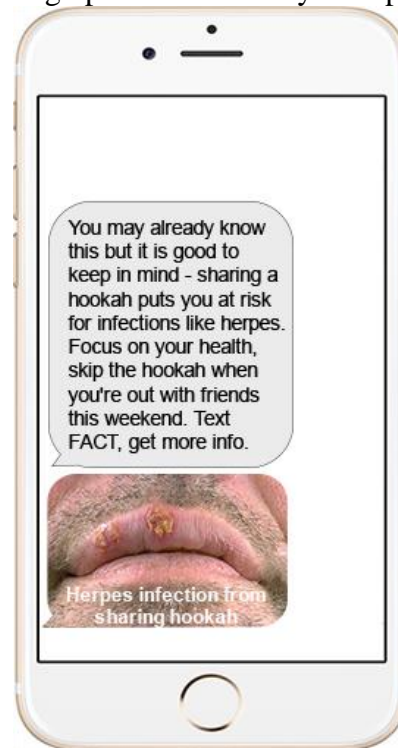

Supplement: Supplementary file 1 [file 19037126]
